# Supplementary material
Source: PubMed Central journal article supplement (PMC2628568)
Supplement: NIHMS3445-supplement-Supp_Figs_1-6.pdf [file NIHMS3445-supplement-Supp_Figs_1-6.pdf]

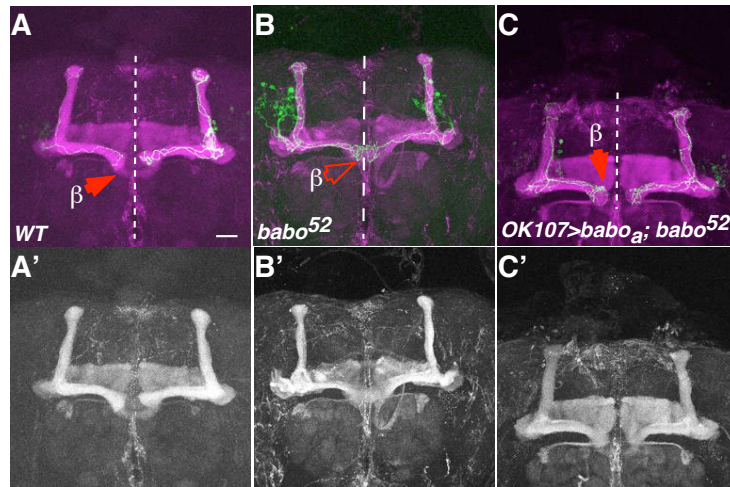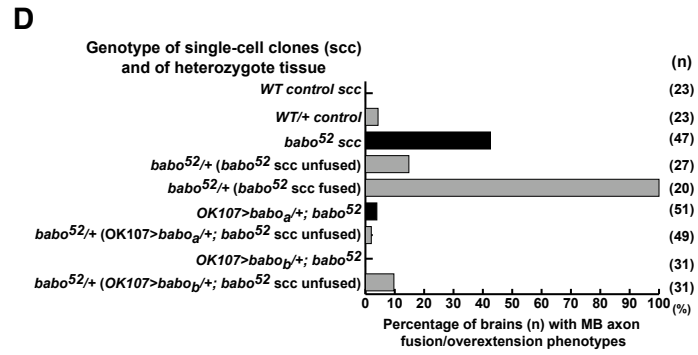

# Supplementary Figure S1 Ng

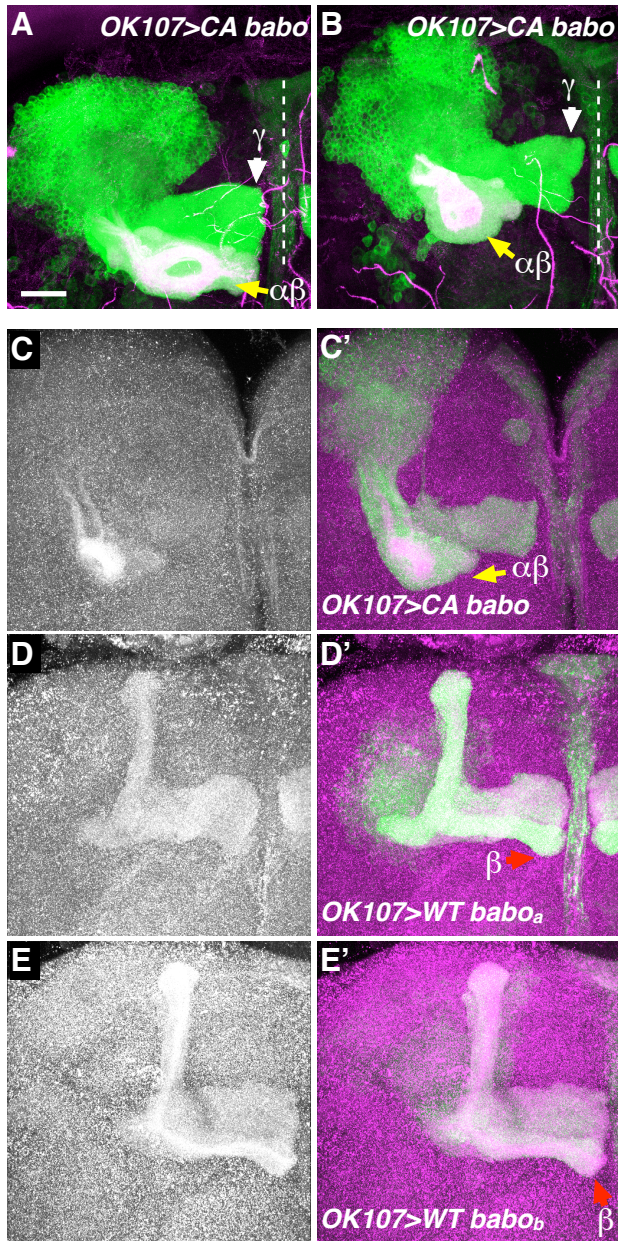

**Supplementary  
Figure S2  
Ng**

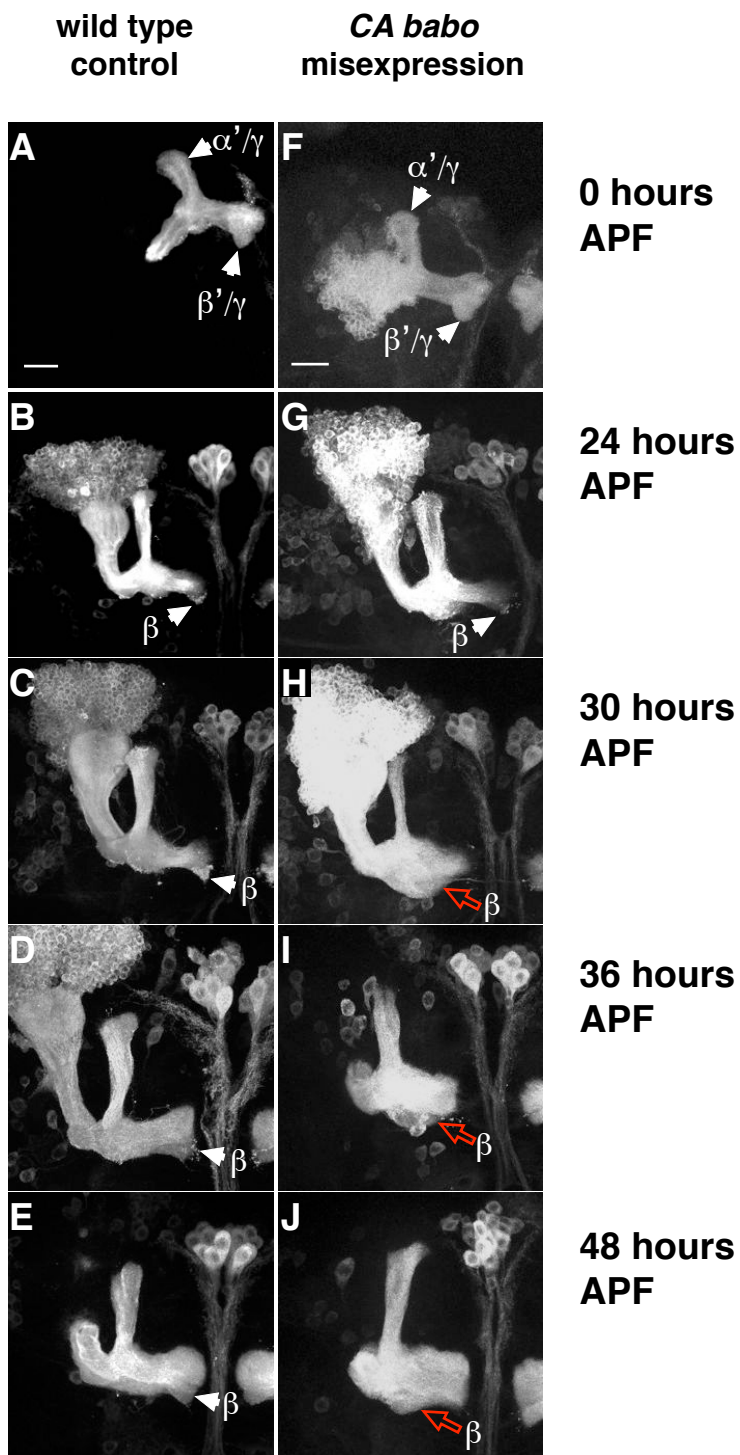

**Supplementary  
Figure S3  
Ng**

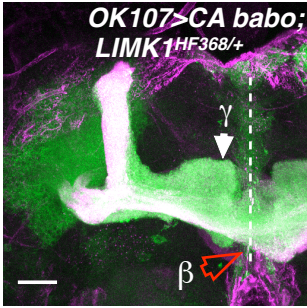

**Supplementary  
Figure S4  
Ng**

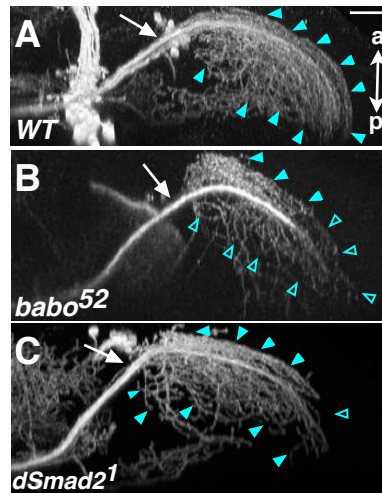

**Supplementary  
Figure S5  
Ng**

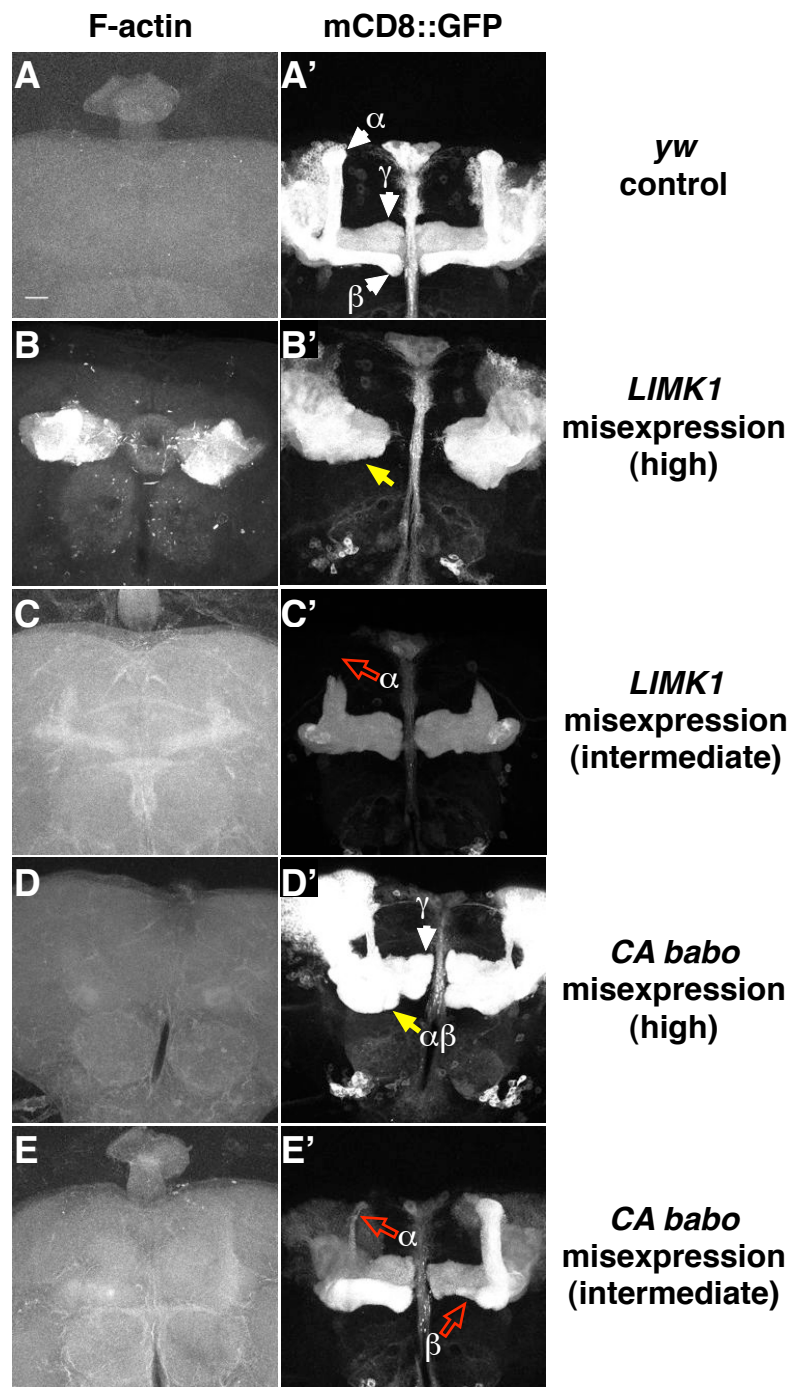

**Supplementary  
Figure S6  
Ng**
